# Supplementary material for: Utilizing Metagenomic Next-Generation Sequencing (mNGS) for Rapid Pathogen Identification and to Inform Clinical Decision-Making: Results from a Large Real-World Cohort
Source: Springer Nature journal article supplement (doi:10.1007/s40121-023-00790-5), 2023-03-29
Supplement: MOESM1 [file 25172396]

## Supplementary Material

### Utilizing Metagenomic Next-Generation Sequencing (mNGS) for Rapid Pathogen Identification and to Inform Clinical Decision-Making: Results From a Large Real-World Cohort

#### Running title: Application of mNGS in clinical practice

Jie Xu<sup>1,#</sup>, Peng Zhou<sup>2,#</sup>, Jia Liu<sup>3</sup>, Lina Zhao<sup>4</sup>, Hailong Fu<sup>1</sup>, Qingzhen Han<sup>2</sup>, Lin Wang<sup>2</sup>, Weiwei Wu<sup>3</sup>, Qiuxiang Ou<sup>3</sup>, Yutong Ma<sup>3</sup>, Jun He<sup>1,5\*</sup>

<sup>1</sup> Clinical Laboratory Center, The First Affiliated Hospital of Soochow University, Suzhou, 215031, China

<sup>2</sup> Center of Translational Medicine and Clinical Laboratory, Dushu Lake Hospital Affiliated to Soochow University, Suzhou, 215028, China

<sup>3</sup> Dinfectome Inc., Nanjing 210000, Jiangsu, China

<sup>4</sup> Department of Laboratory Medicine, Ren Ji Hospital, Shanghai Jiao Tong University School of Medicine, Shanghai 200127, China

<sup>5</sup> HLA Laboratory of Jiangsu Institute of Hematology, Collaborative Innovation Center of Hematology, the First Affiliated Hospital of Soochow University, Suzhou, Jiangsu, China

# The authors contributed equally to this work.

\* Corresponding author

#### Corresponding to:

**Jun He**, MD,

HLA Laboratory of Jiangsu Institute of Hematology, Collaborative Innovation Center of Hematology, the First Affiliated Hospital of Soochow University 13/f (West), Hospital Comprehensive Building, No.899 Ping Hai Road, Suzhou, Jiangsu, China, 215031

Email: junhe1964@163.com

## **Index**

**Figure S1.** The performance of mNGS assay using simulated data.

**Table S1.** The comparison of mNGS and CT results of 188 patients (201 samples) with various infectious diseases.

**Table S2.** The medical information of 24 cases whose mNGS results assisted treatment modification.

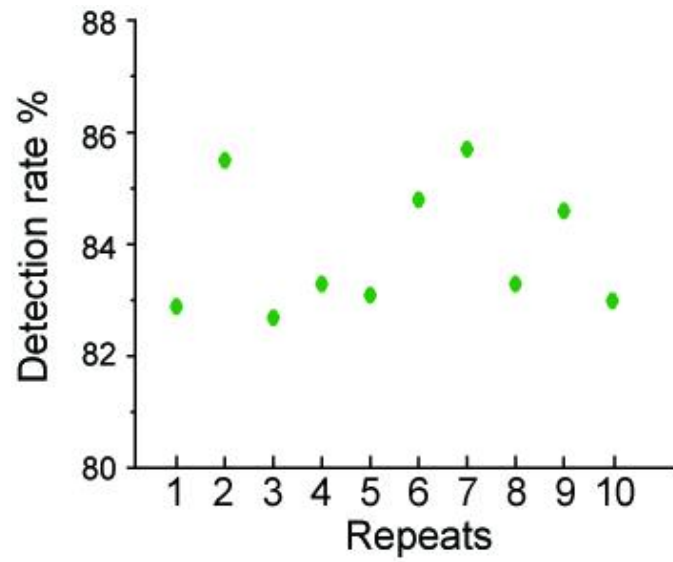

**Figure S1.** The performance of mNGS assay using simulated data.

Simulation was repeated 10 times using randomly selected microbes (N = 1000).

**Table S1.** The comparison of mNGS and CT results of 188 patients (201 samples) with various infectious diseases.

| SID | PID | Sex | Age | Sample Type | Infection Site | CMT                                                                       | real-time PCR | CT (CMT + real-time PCR)                                                  | mNGS                                                                                    | mNGS/CT comparison            | Micro Match Level | Concordant Pathogen Type           |
|-----|-----|-----|-----|-------------|----------------|---------------------------------------------------------------------------|---------------|---------------------------------------------------------------------------|-----------------------------------------------------------------------------------------|-------------------------------|-------------------|------------------------------------|
| 1   | P1  | M   | 80  | Blood       | LRI            | negative                                                                  | n.a.          | negative                                                                  | Pneumocystis jirovecii + Human betaherpesvirus 5                                        | mNGS-positive                 | -                 | -                                  |
| 2   | P2  | F   | 42  | Blood       | Unknown        | Corynebacterium tuberculostearicum                                        | n.a.          | Corynebacterium tuberculostearicum                                        | Corynebacterium tuberculostearicum                                                      | double-positive (concordant)  | species           | G+                                 |
| 3   | P3  | F   | 64  | Blood       | Unknown        | negative                                                                  | n.a.          | negative                                                                  | negative                                                                                | double-negative               | -                 | -                                  |
| 4   | P4  | M   | 87  | sputum      | LRI            | Staphylococcus aureus + Pseudomonas aeruginosa                            | n.a.          | Staphylococcus aureus + Pseudomonas aeruginosa                            | Stenotrophomonas maltophilia + Pseudomonas aeruginosa                                   | double-positive (overlapping) | species           | -                                  |
| 5   | P5  | M   | 29  | sputum      | Unknown        | negative                                                                  | n.a.          | negative                                                                  | Human herpesvirus 1                                                                     | mNGS-positive                 | -                 | -                                  |
| 6   | P1  | M   | 80  | sputum      | LRI            | Acinetobacter baumannii                                                   | n.a.          | Acinetobacter baumannii                                                   | Acinetobacter baumannii                                                                 | double-positive (concordant)  | species           | G-                                 |
| 7   | P6  | M   | 33  | sputum      | Unknown        | Viridans Streptococci                                                     | n.a.          | Viridans Streptococci                                                     | Streptococcus oralis                                                                    | double-positive (concordant)  | species           | G+                                 |
| 8   | P7  | M   | 51  | sputum      | LRI            | negative                                                                  | n.a.          | negative                                                                  | Staphylococcus haemolyticus + Enterococcus faecium + Mycobacterium tuberculosis Complex | mNGS-positive                 | -                 | -                                  |
| 9   | P8  | M   | 24  | BALF        | LRI            | Klebsiella pneumoniae                                                     | n.a.          | Klebsiella pneumoniae                                                     | Klebsiella pneumoniae                                                                   | double-positive (concordant)  | species           | G-                                 |
| 10  | P9  | M   | 75  | BALF        | LRI            | Candida albicans                                                          | n.a.          | Candida albicans                                                          | Candida albicans                                                                        | double-positive (concordant)  | species           | Fungi                              |
| 11  | P10 | M   | 15  | BALF        | Unknown        | negative                                                                  | n.a.          | negative                                                                  | Staphylococcus capitis + Human herpesvirus 6                                            | mNGS-positive                 | -                 | -                                  |
| 12  | P3  | F   | 64  | BALF        | Unknown        | Aspergillus                                                               | n.a.          | Aspergillus                                                               | Klebsiella aerogenes                                                                    | double-positive (discordant)  | -                 | -                                  |
| 13  | P11 | F   | 23  | Blood       | Unknown        | negative                                                                  | n.a.          | negative                                                                  | negative                                                                                | double-negative               | -                 | -                                  |
| 14  | P12 | M   | 56  | sputum      | Unknown        | Viridans Streptococci                                                     | n.a.          | Viridans Streptococci                                                     | Streptococcus agalactiae + Human betaherpesvirus 7                                      | double-positive (overlapping) | genus             | -                                  |
| 15  | P13 | M   | 73  | sputum      | Unknown        | Candida + Staphylococcus lugdunensis + Corynebacterium tuberculostearicum | n.a.          | Candida + Staphylococcus lugdunensis + Corynebacterium tuberculostearicum | Staphylococcus lugdunensis + Corynebacterium tuberculostearicum + Candida albicans      | double-positive (concordant)  | genus             | Polymicrobial (bacteria and fungi) |
| 16  | P14 | M   | 29  | BALF        | LRI            | Mycobacterium                                                             | n.a.          | Mycobacterium                                                             | Mycobacterium tuberculosis Complex                                                      | double-positive (concordant)  | genus             | MTB                                |

|    |     |   |    |       |                  |                                                  |                                                               |                                                        |                                                                                                       |                                  |         |                                                      |
|----|-----|---|----|-------|------------------|--------------------------------------------------|---------------------------------------------------------------|--------------------------------------------------------|-------------------------------------------------------------------------------------------------------|----------------------------------|---------|------------------------------------------------------|
| 17 | P15 | M | 86 | BALF  | LRI              | Candida albicans +<br>Viridans Streptococci      | n.a.                                                          | Candida albicans +<br>Viridans Streptococci            | Human herpesvirus 1                                                                                   | double-positive<br>(discordant)  | -       | -                                                    |
| 18 | P16 | M | 62 | BALF  | LRI              | Candida                                          | n.a.                                                          | Candida                                                | Enterococcus faecium                                                                                  | double-positive<br>(discordant)  | -       | -                                                    |
| 19 | P17 | M | 38 | BALF  | LRI              | negative                                         | n.a.                                                          | negative                                               | negative                                                                                              | double-negative                  | -       | -                                                    |
| 20 | P18 | M | 62 | BALF  | Unknown          | negative                                         | n.a.                                                          | negative                                               | negative                                                                                              | double-negative                  | -       | -                                                    |
| 21 | P19 | M | 54 | BALF  | LRI              | negative                                         | Legionella<br>pneumophila (-)                                 | negative                                               | Legionella pneumophila                                                                                | mNGS-positive                    | -       | -                                                    |
| 22 | P20 | M | 56 | BALF  | LRI              | Viridans Streptococci                            | n.a.                                                          | Viridans<br>Streptococci                               | Human betaherpesvirus 5                                                                               | double-positive<br>(discordant)  | -       | -                                                    |
| 23 | P21 | F | 52 | BALF  | LRI              | Neisseria                                        | n.a.                                                          | Neisseria                                              | Neisseria subflava                                                                                    | double-positive<br>(concordant)  | genus   | G-                                                   |
| 24 | P22 | M | 46 | BALF  | LRI              | negative                                         | Pneumocystis jirovecii<br>(+)                                 | Pneumocystis<br>jirovecii                              | Pneumocystis jirovecii                                                                                | double-positive<br>(concordant)  | species | Fungi                                                |
| 25 | P23 | M | 18 | BALF  | LRI              | Viridans Streptococci                            | n.a.                                                          | Viridans<br>Streptococci                               | Haemophilus<br>parainfluenzae                                                                         | double-positive<br>(discordant)  | -       | -                                                    |
| 26 | P24 | M | 65 | BALF  | LRI              | negative                                         | n.a.                                                          | negative                                               | Mycoplasma hominis                                                                                    | mNGS-positive                    | -       | -                                                    |
| 27 | P25 | F | 19 | BALF  | LRI              | negative                                         | Human<br>betaherpesvirus 5 (+)                                | Human<br>betaherpesvirus 5                             | Human betaherpesvirus 5                                                                               | double-positive<br>(concordant)  | species | Viruses                                              |
| 28 | P26 | M | 16 | BALF  | LRI              | Viridans Streptococci +<br>Klebsiella pneumoniae | n.a.                                                          | Viridans<br>Streptococci +<br>Klebsiella<br>pneumoniae | Klebsiella pneumoniae +<br>Streptococcus oralis                                                       | double-positive<br>(concordant)  | species | Polymicrobial<br>(multiple<br>bacteria)              |
| 29 | P27 | M | 62 | BALF  | LRI              | Proteus mirabilis                                | n.a.                                                          | Proteus mirabilis                                      | Pseudomonas aeruginosa +<br>Klebsiella pneumoniae +<br>Acinetobacter baumannii +<br>Proteus mirabilis | double-positive<br>(overlapping) | species | -                                                    |
| 30 | P28 | M | 57 | BALF  | LRI              | negative                                         | Pneumocystis jirovecii<br>(-), Human<br>betaherpesvirus 5 (+) | Human<br>betaherpesvirus 5                             | Human betaherpesvirus 5 +<br>Pneumocystis jirovecii                                                   | double-positive<br>(overlapping) | species | -                                                    |
| 31 | P29 | F | 71 | Blood | BSI              | negative                                         | Escherichia coli (-)                                          | negative                                               | Escherichia coli                                                                                      | mNGS-positive                    | -       | -                                                    |
| 32 | P27 | M | 62 | Blood | LRI              | negative                                         | Pseudomonas<br>aeruginosa (+)                                 | Pseudomonas<br>aeruginosa                              | Pseudomonas aeruginosa                                                                                | double-positive<br>(concordant)  | species | G-                                                   |
| 33 | P11 | F | 23 | Blood | Unknown          | negative                                         | Pneumocystis jirovecii<br>(-)                                 | negative                                               | Pneumocystis jirovecii                                                                                | mNGS-positive                    | -       | -                                                    |
| 34 | P30 | M | 54 | Blood | Unknown          | negative                                         | n.a.                                                          | negative                                               | negative                                                                                              | double-negative                  | -       | -                                                    |
| 35 | P31 | M | 24 | Blood | Typhoid<br>fever | negative                                         | n.a.                                                          | negative                                               | negative                                                                                              | double-negative                  | -       | -                                                    |
| 36 | P32 | F | 38 | Blood | Unknown          | negative                                         | Pneumocystis jirovecii<br>(+), Human<br>betaherpesvirus 5 (+) | Pneumocystis<br>jirovecii + Human<br>betaherpesvirus 5 | Pneumocystis jirovecii +<br>Human betaherpesvirus 5                                                   | double-positive<br>(concordant)  | species | Polymicrobial<br>infection<br>(fungi and<br>viruses) |
| 37 | P33 | M | 69 | Blood | Unknown          | negative                                         | n.a.                                                          | negative                                               | negative                                                                                              | double-negative                  | -       | -                                                    |
| 38 | P34 | M | 60 | Blood | LRI              | negative                                         | n.a.                                                          | negative                                               | negative                                                                                              | double-negative                  | -       | -                                                    |

|    |     |   |    |        |         |                                   |                             |                                   |                                                                    |                              |         |                                   |
|----|-----|---|----|--------|---------|-----------------------------------|-----------------------------|-----------------------------------|--------------------------------------------------------------------|------------------------------|---------|-----------------------------------|
| 39 | P35 | F | 68 | Blood  | Unknown | Escherichia coli                  | n.a.                        | Escherichia coli                  | Escherichia coli                                                   | double-positive (concordant) | species | G-                                |
| 40 | P36 | F | 19 | Blood  | Unknown | negative                          | n.a.                        | negative                          | negative                                                           | double-negative              | -       | -                                 |
| 41 | P37 | M | 47 | Blood  | Unknown | negative                          | n.a.                        | negative                          | negative                                                           | double-negative              | -       | -                                 |
| 42 | P38 | M | 83 | Blood  | LRI     | negative                          | n.a.                        | negative                          | Cryptococcus neoformans + Enterococcus faecalis                    | mNGS-positive                | -       | -                                 |
| 43 | P39 | M | 20 | Blood  | BSI     | Klebsiella pneumoniae             | n.a.                        | Klebsiella pneumoniae             | Klebsiella pneumoniae                                              | double-positive (concordant) | species | G-                                |
| 44 | P40 | F | 27 | Blood  | Unknown | negative                          | n.a.                        | negative                          | negative                                                           | double-negative              | -       | -                                 |
| 45 | P41 | M | 76 | Blood  | CNSI    | negative                          | n.a.                        | negative                          | Human herpesvirus 1 + Acinetobacter baumannii + Epstein-Barr virus | mNGS-positive                | -       | -                                 |
| 46 | P7  | M | 51 | Blood  | LRI     | negative                          | n.a.                        | negative                          | Epstein-Barr virus                                                 | mNGS-positive                | -       | -                                 |
| 47 | P42 | M | 67 | Blood  | LRI     | negative                          | n.a.                        | negative                          | Pneumocystis jirovecii + Human herpesvirus 1                       | mNGS-positive                | -       | -                                 |
| 48 | P43 | F | 68 | Blood  | Unknown | negative                          | n.a.                        | negative                          | negative                                                           | double-negative              | -       | -                                 |
| 49 | P44 | M | 81 | Blood  | LRI     | negative                          | n.a.                        | negative                          | Pneumocystis jirovecii                                             | mNGS-positive                | -       | -                                 |
| 50 | P45 | F | 43 | Blood  | BSI     | Escherichia coli                  | n.a.                        | Escherichia coli                  | Escherichia coli                                                   | double-positive (concordant) | species | G-                                |
| 51 | P46 | M | 56 | Blood  | Unknown | negative                          | n.a.                        | negative                          | Torque teno virus 29                                               | mNGS-positive                | -       | -                                 |
| 52 | P47 | F | 37 | Blood  | BSI     | Enterococcus faecium              | n.a.                        | Enterococcus faecium              | Enterococcus faecium                                               | double-positive (concordant) | species | G+                                |
| 53 | P48 | M | 67 | Blood  | Unknown | Escherichia coli                  | n.a.                        | Escherichia coli                  | Enterobacter cloacae + Stenotrophomonas maltophilia                | double-positive (discordant) | -       | -                                 |
| 54 | P49 | F | 52 | Blood  | Unknown | negative                          | n.a.                        | negative                          | negative                                                           | double-negative              | -       | -                                 |
| 55 | P50 | F | 28 | Blood  | BSI+LRI | negative                          | Acinetobacter baumannii (-) | negative                          | Acinetobacter baumannii                                            | mNGS-positive                | -       | -                                 |
| 56 | P51 | M | 69 | sputum | Unknown | Viridans Streptococci + Neisseria | n.a.                        | Viridans Streptococci + Neisseria | Neisseria subflava + Streptococcus parasanguinis                   | double-positive (concordant) | genus   | Polymicrobial (multiple bacteria) |
| 57 | P52 | M | 67 | sputum | Unknown | Pseudomonas aeruginosa            | n.a.                        | Pseudomonas aeruginosa            | Pseudomonas aeruginosa                                             | double-positive (concordant) | species | G-                                |
| 58 | P53 | M | 31 | sputum | LRI     | Viridans Streptococci             | n.a.                        | Viridans Streptococci             | Streptococcus salivarius                                           | double-positive (concordant) | genus   | G+                                |
| 59 | P54 | F | 89 | sputum | Unknown | Viridans Streptococci             | n.a.                        | Viridans Streptococci             | Stenotrophomonas maltophilia + Candida glabrata                    | double-positive (discordant) | -       | -                                 |
| 60 | P55 | F | 31 | sputum | Unknown | Viridans Streptococci             | n.a.                        | Viridans Streptococci             | Stenotrophomonas maltophilia + Haemophilus parainfluenzae          | double-positive (discordant) | -       | -                                 |
| 61 | P56 | M | 65 | sputum | Unknown | Klebsiella pneumoniae             | n.a.                        | Klebsiella pneumoniae             | Klebsiella pneumoniae                                              | double-positive (concordant) | species | G-                                |

|    |     |   |    |        |         |                                                                                    |      |                                                                                    |                                                                                             |                               |         |                                   |
|----|-----|---|----|--------|---------|------------------------------------------------------------------------------------|------|------------------------------------------------------------------------------------|---------------------------------------------------------------------------------------------|-------------------------------|---------|-----------------------------------|
| 62 | P57 | F | 17 | sputum | Unknown | <i>Pseudomonas aeruginosa</i>                                                      | n.a. | <i>Pseudomonas aeruginosa</i>                                                      | <i>Pseudomonas aeruginosa</i>                                                               | double-positive (concordant)  | species | G-                                |
| 63 | P58 | F | 75 | sputum | LRI     | <i>Acinetobacter baumannii</i>                                                     | n.a. | <i>Acinetobacter baumannii</i>                                                     | <i>Acinetobacter baumannii</i>                                                              | double-positive (concordant)  | species | G-                                |
| 64 | P59 | M | 88 | sputum | Unknown | Viridans Streptococci                                                              | n.a. | Viridans Streptococci                                                              | <i>Stenotrophomonas maltophilia</i>                                                         | double-positive (discordant)  | -       | -                                 |
| 65 | P60 | F | 81 | sputum | Unknown | <i>Acinetobacter baumannii</i>                                                     | n.a. | <i>Acinetobacter baumannii</i>                                                     | <i>Acinetobacter baumannii</i>                                                              | double-positive (concordant)  | species | G-                                |
| 66 | P61 | M | 24 | sputum | LRI     | <i>Mycobacterium</i>                                                               | n.a. | <i>Mycobacterium</i>                                                               | <i>Mycobacterium tuberculosis</i>                                                           | double-positive (concordant)  | genus   | MTB                               |
| 67 | P62 | M | 19 | sputum | Unknown | negative                                                                           | n.a. | negative                                                                           | <i>Prevotella jejuni</i>                                                                    | mNGS-positive                 | -       | -                                 |
| 68 | P63 | M | 63 | sputum | Unknown | Viridans Streptococci + <i>Rothia mucilaginosa</i>                                 | n.a. | Viridans Streptococci + <i>Rothia mucilaginosa</i>                                 | <i>Streptococcus oralis</i> + <i>Rothia mucilaginosa</i>                                    | double-positive (concordant)  | species | Polymicrobial (multiple bacteria) |
| 69 | P64 | F | 71 | sputum | Unknown | <i>Stenotrophomonas maltophilia</i>                                                | n.a. | <i>Stenotrophomonas maltophilia</i>                                                | <i>Stenotrophomonas maltophilia</i>                                                         | double-positive (concordant)  | species | G-                                |
| 70 | P65 | M | 68 | sputum | Unknown | <i>Neisseria</i>                                                                   | n.a. | <i>Neisseria</i>                                                                   | <i>Neisseria subflava</i>                                                                   | double-positive (concordant)  | genus   | G-                                |
| 71 | P66 | F | 64 | sputum | Unknown | <i>Staphylococcus epidermidis</i>                                                  | n.a. | <i>Staphylococcus epidermidis</i>                                                  | <i>Staphylococcus epidermidis</i>                                                           | double-positive (concordant)  | species | G+                                |
| 72 | P67 | M | 63 | sputum | Unknown | Viridans Streptococci                                                              | n.a. | Viridans Streptococci                                                              | <i>Staphylococcus haemolyticus</i> + <i>Gordonia bronchialis</i>                            | double-positive (discordant)  | -       | -                                 |
| 73 | P68 | M | 50 | sputum | Unknown | <i>Klebsiella pneumoniae</i>                                                       | n.a. | <i>Klebsiella pneumoniae</i>                                                       | <i>Klebsiella pneumoniae</i>                                                                | double-positive (concordant)  | species | G-                                |
| 74 | P69 | M | 60 | sputum | Unknown | Viridans Streptococci + <i>Serratia marcescens</i> + <i>Aggregatibacter segnis</i> | n.a. | Viridans Streptococci + <i>Serratia marcescens</i> + <i>Aggregatibacter segnis</i> | <i>Streptococcus anginosus</i> + <i>Serratia marcescens</i> + <i>Aggregatibacter segnis</i> | double-positive (concordant)  | species | Polymicrobial (multiple bacteria) |
| 75 | P70 | M | 60 | sputum | Unknown | Viridans Streptococci                                                              | n.a. | Viridans Streptococci                                                              | <i>Haemophilus parainfluenzae</i>                                                           | double-positive (discordant)  | -       | -                                 |
| 76 | P71 | M | 74 | sputum | Unknown | <i>Acinetobacter baumannii</i>                                                     | n.a. | <i>Acinetobacter baumannii</i>                                                     | <i>Acinetobacter baumannii</i>                                                              | double-positive (concordant)  | species | G-                                |
| 77 | P72 | F | 86 | sputum | LRI     | <i>Staphylococcus aureus</i> + <i>Enterobacter cloacae</i>                         | n.a. | <i>Staphylococcus aureus</i> + <i>Enterobacter cloacae</i>                         | <i>Staphylococcus aureus</i>                                                                | double-positive (overlapping) | species | -                                 |
| 78 | P73 | M | 71 | sputum | Unknown | <i>Staphylococcus aureus</i>                                                       | n.a. | <i>Staphylococcus aureus</i>                                                       | <i>Staphylococcus aureus</i>                                                                | double-positive (concordant)  | species | G+                                |
| 79 | P74 | M | 84 | sputum | Unknown | <i>Candida albicans</i>                                                            | n.a. | <i>Candida albicans</i>                                                            | <i>Klebsiella pneumoniae</i>                                                                | double-positive (discordant)  | -       | -                                 |

|    |     |   |    |        |         |                                                                            |      |                                                                            |                                                                            |                               |         |                                   |
|----|-----|---|----|--------|---------|----------------------------------------------------------------------------|------|----------------------------------------------------------------------------|----------------------------------------------------------------------------|-------------------------------|---------|-----------------------------------|
| 80 | P75 | F | 69 | sputum | Unknown | Neisseria                                                                  | n.a. | Neisseria                                                                  | Stenotrophomonas maltophilia                                               | double-positive (discordant)  | -       | -                                 |
| 81 | P76 | M | 49 | sputum | LRI     | Neisseria + Enterobacter cloacae                                           | n.a. | Neisseria + Enterobacter cloacae                                           | Neisseria subflava + Enterobacter cloacae                                  | double-positive (concordant)  | genus   | Polymicrobial (multiple bacteria) |
| 82 | P77 | F | 38 | sputum | Unknown | Viridans Streptococci + Neisseria                                          | n.a. | Viridans Streptococci + Neisseria                                          | Streptococcus salivarius + Neisseria elongata                              | double-positive (concordant)  | genus   | Polymicrobial (multiple bacteria) |
| 83 | P78 | M | 38 | sputum | Unknown | negative                                                                   | n.a. | negative                                                                   | Stenotrophomonas maltophilia                                               | mNGS-positive                 | -       | -                                 |
| 84 | P79 | M | 63 | sputum | Unknown | Viridans Streptococci                                                      | n.a. | Viridans Streptococci                                                      | Enterococcus faecalis                                                      | double-positive (discordant)  | -       | -                                 |
| 85 | P80 | F | 41 | sputum | LRI     | Candida albicans                                                           | n.a. | Candida albicans                                                           | Candida glabrata + Klebsiella pneumoniae                                   | double-positive (discordant)  | -       | -                                 |
| 86 | P81 | F | /  | sputum | Unknown | Aspergillus fumigatus                                                      | n.a. | Aspergillus fumigatus                                                      | Candida parapsilosis                                                       | double-positive (discordant)  | -       | -                                 |
| 87 | P82 | F | 86 | sputum | Unknown | Candida glabrata + Candida albicans                                        | n.a. | Candida glabrata + Candida albicans                                        | Candida glabrata                                                           | double-positive (overlapping) | species | -                                 |
| 88 | P83 | M | 53 | sputum | LRI     | Klebsiella pneumoniae                                                      | n.a. | Klebsiella pneumoniae                                                      | Klebsiella pneumoniae                                                      | double-positive (concordant)  | species | G-                                |
| 89 | P84 | M | 53 | sputum | LRI     | Rothia mucilaginosa                                                        | n.a. | Rothia mucilaginosa                                                        | Rothia mucilaginosa                                                        | double-positive (concordant)  | species | G+                                |
| 90 | P85 | M | 72 | sputum | Unknown | Rothia mucilaginosa                                                        | n.a. | Rothia mucilaginosa                                                        | Rothia mucilaginosa                                                        | double-positive (concordant)  | species | G+                                |
| 91 | P86 | M | 52 | sputum | Unknown | negative                                                                   | n.a. | negative                                                                   | Klebsiella pneumoniae + Pseudomonas aeruginosa                             | mNGS-positive                 | -       | -                                 |
| 92 | P87 | F | 38 | sputum | Unknown | Klebsiella pneumoniae                                                      | n.a. | Klebsiella pneumoniae                                                      | Klebsiella pneumoniae                                                      | double-positive (concordant)  | species | G-                                |
| 93 | P88 | M | 56 | sputum | LRI     | Klebsiella pneumoniae + Acinetobacter baumannii + Corynebacterium striatum | n.a. | Klebsiella pneumoniae + Acinetobacter baumannii + Corynebacterium striatum | Klebsiella pneumoniae + Acinetobacter baumannii + Corynebacterium striatum | double-positive (concordant)  | species | Polymicrobial (multiple bacteria) |
| 94 | P89 | F | 45 | sputum | Unknown | negative                                                                   | n.a. | negative                                                                   | Aspergillus fumigatus                                                      | mNGS-positive                 | -       | -                                 |
| 95 | P90 | M | 47 | sputum | LRI     | Acinetobacter baumannii                                                    | n.a. | Acinetobacter baumannii                                                    | Acinetobacter baumannii                                                    | double-positive (concordant)  | species | G-                                |
| 96 | P91 | M | 81 | sputum | Unknown | Viridans Streptococci + Candida                                            | n.a. | Viridans Streptococci + Candida                                            | Candida albicans                                                           | double-positive (overlapping) | genus   | -                                 |
| 97 | P92 | M | 55 | sputum | LRI     | Neisseria                                                                  | n.a. | Neisseria                                                                  | Neisseria subflava                                                         | double-positive (concordant)  | genus   | G-                                |
| 98 | P93 | M | 50 | sputum | Unknown | Corynebacterium + Klebsiella pneumoniae                                    | n.a. | Corynebacterium + Klebsiella pneumoniae                                    | Corynebacterium striatum + Klebsiella pneumoniae                           | double-positive (concordant)  | genus   | Polymicrobial (multiple bacteria) |



|     |      |   |    |        |         |                                                                                                     |      |                                                                                                     |                                                                                                     |                               |         |                                   |
|-----|------|---|----|--------|---------|-----------------------------------------------------------------------------------------------------|------|-----------------------------------------------------------------------------------------------------|-----------------------------------------------------------------------------------------------------|-------------------------------|---------|-----------------------------------|
| 99  | P94  | M | 61 | sputum | LRI     | <i>Pseudomonas aeruginosa</i>                                                                       | n.a. | <i>Pseudomonas aeruginosa</i>                                                                       | <i>Pseudomonas aeruginosa</i>                                                                       | double-positive (concordant)  | species | G-                                |
| 100 | P95  | M | 92 | sputum | LRI     | <i>Pseudomonas aeruginosa</i>                                                                       | n.a. | <i>Pseudomonas aeruginosa</i>                                                                       | <i>Pseudomonas aeruginosa</i>                                                                       | double-positive (concordant)  | species | G-                                |
| 101 | P96  | M | 78 | sputum | LRI     | <i>Candida albicans</i>                                                                             | n.a. | <i>Candida albicans</i>                                                                             | <i>Streptococcus salivarius</i>                                                                     | double-positive (discordant)  | -       | -                                 |
| 102 | P97  | M | 49 | sputum | LRI     | <i>Acinetobacter baumannii</i>                                                                      | n.a. | <i>Acinetobacter baumannii</i>                                                                      | <i>Acinetobacter baumannii</i>                                                                      | double-positive (concordant)  | species | G-                                |
| 103 | P98  | F | 54 | sputum | Unknown | <i>Klebsiella pneumoniae</i> +<br><i>Viridans Streptococci</i>                                      | n.a. | <i>Klebsiella pneumoniae</i> +<br><i>Viridans Streptococci</i>                                      | <i>Streptococcus mitis</i>                                                                          | double-positive (overlapping) | species | -                                 |
| 104 | P99  | F | 82 | sputum | Unknown | <i>Viridans Streptococci</i>                                                                        | n.a. | <i>Viridans Streptococci</i>                                                                        | <i>Streptococcus mitis</i>                                                                          | double-positive (concordant)  | species | G+                                |
| 105 | P100 | F | 43 | sputum | Unknown | <i>Candida</i>                                                                                      | n.a. | <i>Candida</i>                                                                                      | negative                                                                                            | CT-positive                   | -       | -                                 |
| 106 | P101 | F | 67 | sputum | Unknown | <i>Candida</i> +<br><i>Corynebacterium striatum</i>                                                 | n.a. | <i>Candida</i> +<br><i>Corynebacterium striatum</i>                                                 | <i>Corynebacterium striatum</i>                                                                     | double-positive (overlapping) | species | -                                 |
| 107 | P102 | M | 87 | sputum | LRI     | <i>Staphylococcus aureus</i> +<br><i>Acinetobacter baumannii</i> +<br><i>Pseudomonas aeruginosa</i> | n.a. | <i>Staphylococcus aureus</i> +<br><i>Acinetobacter baumannii</i> +<br><i>Pseudomonas aeruginosa</i> | <i>Staphylococcus aureus</i> +<br><i>Acinetobacter baumannii</i> +<br><i>Pseudomonas aeruginosa</i> | double-positive (concordant)  | species | Polymicrobial (multiple bacteria) |
| 108 | P103 | M | 65 | sputum | LRI     | <i>Rothia mucilaginosa</i>                                                                          | n.a. | <i>Rothia mucilaginosa</i>                                                                          | <i>Rothia mucilaginosa</i>                                                                          | double-positive (concordant)  | species | G+                                |
| 109 | P64  | F | 71 | sputum | Unknown | <i>Penicillium</i>                                                                                  | n.a. | <i>Penicillium</i>                                                                                  | <i>Stenotrophomonas maltophilia</i> +<br><i>Burkholderia stabilis</i> +<br>Human herpesvirus 1      | double-positive (discordant)  | -       | -                                 |
| 110 | P104 | F | 80 | sputum | Unknown | <i>Pseudomonas aeruginosa</i>                                                                       | n.a. | <i>Pseudomonas aeruginosa</i>                                                                       | <i>Pseudomonas aeruginosa</i>                                                                       | double-positive (concordant)  | species | G-                                |
| 111 | P105 | M | 81 | sputum | LRI     | <i>Pseudomonas aeruginosa</i>                                                                       | n.a. | <i>Pseudomonas aeruginosa</i>                                                                       | <i>Pseudomonas aeruginosa</i>                                                                       | double-positive (concordant)  | species | G-                                |
| 112 | P106 | M | 78 | sputum | LRI     | <i>Aspergillus fumigatus</i> +<br><i>Aspergillus flavus</i>                                         | n.a. | <i>Aspergillus fumigatus</i> +<br><i>Aspergillus flavus</i>                                         | Human herpesvirus 1                                                                                 | double-positive (discordant)  | -       | -                                 |
| 113 | P107 | M | 60 | sputum | LRI     | <i>Viridans Streptococci</i> +<br><i>Neisseria</i>                                                  | n.a. | <i>Viridans Streptococci</i> +<br><i>Neisseria</i>                                                  | <i>Neisseria elongata</i>                                                                           | double-positive (overlapping) | genus   | -                                 |
| 114 | P108 | M | 67 | sputum | LRI     | <i>Proteus mirabilis</i>                                                                            | n.a. | <i>Proteus mirabilis</i>                                                                            | <i>Proteus mirabilis</i>                                                                            | double-positive (concordant)  | species | G-                                |
| 115 | P109 | M | 78 | sputum | LRI     | <i>Staphylococcus aureus</i>                                                                        | n.a. | <i>Staphylococcus aureus</i>                                                                        | <i>Staphylococcus aureus</i>                                                                        | double-positive (concordant)  | species | G+                                |

|     |      |   |    |        |         |                                                                                                             |      |                                                                                                             |                                                                                                             |                              |         |                                    |
|-----|------|---|----|--------|---------|-------------------------------------------------------------------------------------------------------------|------|-------------------------------------------------------------------------------------------------------------|-------------------------------------------------------------------------------------------------------------|------------------------------|---------|------------------------------------|
| 116 | P110 | M | 66 | sputum | LRI     | Corynebacterium striatum + Burkholderia cepacia                                                             | n.a. | Corynebacterium striatum + Burkholderia cepacia                                                             | Corynebacterium striatum + Burkholderia cepacia                                                             | double-positive (concordant) | species | Polymicrobial (multiple bacteria)  |
| 117 | P111 | F | 86 | sputum | Unknown | Enterococcus faecium + Stenotrophomonas maltophilia + Acinetobacter baumannii + Staphylococcus haemolyticus | n.a. | Enterococcus faecium + Stenotrophomonas maltophilia + Acinetobacter baumannii + Staphylococcus haemolyticus | Enterococcus faecium + Stenotrophomonas maltophilia + Acinetobacter baumannii + Staphylococcus haemolyticus | double-positive (concordant) | species | Polymicrobial (multiple bacteria)  |
| 118 | P70  | M | 60 | sputum | Unknown | Candida albicans                                                                                            | n.a. | Candida albicans                                                                                            | Candida albicans                                                                                            | double-positive (concordant) | species | Fungi                              |
| 119 | P112 | M | 67 | sputum | Unknown | Candida                                                                                                     | n.a. | Candida                                                                                                     | Streptococcus anginosus                                                                                     | double-positive (discordant) | -       | -                                  |
| 120 | P13  | M | 73 | sputum | Unknown | Candida + Staphylococcus lugdunensis                                                                        | n.a. | Candida + Staphylococcus lugdunensis                                                                        | Staphylococcus lugdunensis + Candida albicans                                                               | double-positive (concordant) | genus   | Polymicrobial (bacteria and fungi) |
| 121 | P113 | M | 30 | sputum | LRI     | Acinetobacter baumannii                                                                                     | n.a. | Acinetobacter baumannii                                                                                     | Acinetobacter baumannii                                                                                     | double-positive (concordant) | species | G-                                 |
| 122 | P114 | F | 58 | sputum | LRI     | Pseudomonas aeruginosa                                                                                      | n.a. | Pseudomonas aeruginosa                                                                                      | Pseudomonas aeruginosa                                                                                      | double-positive (concordant) | species | G-                                 |
| 123 | P115 | M | 63 | sputum | Unknown | Viridans Streptococci                                                                                       | n.a. | Viridans Streptococci                                                                                       | Staphylococcus haemolyticus                                                                                 | double-positive (discordant) | -       | -                                  |
| 124 | P116 | F | 68 | sputum | Unknown | Proteus mirabilis + Neisseria                                                                               | n.a. | Proteus mirabilis + Neisseria                                                                               | Proteus mirabilis + Neisseria subflava                                                                      | double-positive (concordant) | genus   | Polymicrobial (multiple bacteria)  |
| 125 | P117 | M | 60 | sputum | Unknown | Acinetobacter baumannii + Burkholderia cepacia + Corynebacterium striatum                                   | n.a. | Acinetobacter baumannii + Burkholderia cepacia + Corynebacterium striatum                                   | Acinetobacter baumannii + Burkholderia cepacia + Corynebacterium striatum                                   | double-positive (concordant) | species | Polymicrobial (multiple bacteria)  |
| 126 | P118 | F | 75 | sputum | LRI     | Acinetobacter baumannii                                                                                     | n.a. | Acinetobacter baumannii                                                                                     | Acinetobacter baumannii                                                                                     | double-positive (concordant) | species | G-                                 |
| 127 | P40  | F | 27 | sputum | Unknown | Neisseria                                                                                                   | n.a. | Neisseria                                                                                                   | Neisseria flavescens                                                                                        | double-positive (concordant) | genus   | G-                                 |
| 128 | P119 | M | 87 | sputum | LRI     | Acinetobacter baumannii                                                                                     | n.a. | Acinetobacter baumannii                                                                                     | Acinetobacter baumannii                                                                                     | double-positive (concordant) | species | G-                                 |
| 129 | P120 | F | 35 | sputum | Unknown | Staphylococcus epidermidis                                                                                  | n.a. | Staphylococcus epidermidis                                                                                  | Staphylococcus epidermidis                                                                                  | double-positive (concordant) | species | G+                                 |
| 130 | P121 | F | 40 | sputum | Unknown | Enterobacter cloacae                                                                                        | n.a. | Enterobacter cloacae                                                                                        | Enterobacter cloacae                                                                                        | double-positive (concordant) | species | G-                                 |

|     |      |   |    |        |         |                                                                                                  |      |                                                                                                  |                                                                                                   |                               |         |                                    |
|-----|------|---|----|--------|---------|--------------------------------------------------------------------------------------------------|------|--------------------------------------------------------------------------------------------------|---------------------------------------------------------------------------------------------------|-------------------------------|---------|------------------------------------|
| 131 | P122 | M | 33 | sputum | LRI     | Aspergillus fumigatus                                                                            | n.a. | Aspergillus fumigatus                                                                            | Aspergillus fumigatus                                                                             | double-positive (concordant)  | species | Fungi                              |
| 132 | P123 | F | 67 | sputum | Unknown | Candida + Burkholderia stabilis                                                                  | n.a. | Candida + Burkholderia stabilis                                                                  | Burkholderia stabilis + Candida albicans                                                          | double-positive (concordant)  | genus   | Polymicrobial (bacteria and fungi) |
| 133 | P124 | M | 42 | sputum | LRI     | Staphylococcus aureus + Viridans Streptococci + Neisseria + Candida                              | n.a. | Staphylococcus aureus + Viridans Streptococci + Neisseria + Candida                              | Staphylococcus aureus + Streptococcus mitis + Neisseria subflava                                  | double-positive (overlapping) | genus   | -                                  |
| 134 | P125 | M | 50 | sputum | Unknown | Klebsiella pneumoniae                                                                            | n.a. | Klebsiella pneumoniae                                                                            | Klebsiella pneumoniae                                                                             | double-positive (concordant)  | species | G-                                 |
| 135 | P126 | M | 25 | sputum | Unknown | Viridans Streptococci                                                                            | n.a. | Viridans Streptococci                                                                            | Streptococcus anginosus                                                                           | double-positive (concordant)  | species | G+                                 |
| 136 | P127 | M | 75 | sputum | LRI     | Pseudomonas aeruginosa                                                                           | n.a. | Pseudomonas aeruginosa                                                                           | Pseudomonas aeruginosa                                                                            | double-positive (concordant)  | species | G-                                 |
| 137 | P124 | M | 42 | sputum | LRI     | Viridans Streptococci + Neisseria + Candida + Staphylococcus aureus + Haemophilus parainfluenzae | n.a. | Viridans Streptococci + Neisseria + Candida + Staphylococcus aureus + Haemophilus parainfluenzae | Streptococcus sanguinis + Neisseria subflava + Staphylococcus aureus + Haemophilus parainfluenzae | double-positive (overlapping) | genus   | -                                  |
| 138 | P128 | M | 84 | sputum | Unknown | Enterococcus faecium + Stenotrophomonas maltophilia                                              | n.a. | Enterococcus faecium + Stenotrophomonas maltophilia                                              | Enterococcus faecium                                                                              | double-positive (overlapping) | species | -                                  |
| 139 | P129 | F | 61 | sputum | Unknown | Viridans Streptococci + Neisseria + Haemophilus parainfluenzae                                   | n.a. | Viridans Streptococci + Neisseria + Haemophilus parainfluenzae                                   | Streptococcus anginosus + Neisseria subflava + Haemophilus parainfluenzae                         | double-positive (concordant)  | genus   | Polymicrobial (multiple bacteria)  |
| 140 | P130 | F | 40 | sputum | LRI     | Staphylococcus aureus + Viridans Streptococci + Neisseria                                        | n.a. | Staphylococcus aureus + Viridans Streptococci + Neisseria                                        | Streptococcus sanguinis                                                                           | double-positive (overlapping) | genus   | -                                  |
| 141 | P131 | M | 56 | sputum | Unknown | Viridans Streptococci                                                                            | n.a. | Viridans Streptococci                                                                            | Streptococcus salivarius                                                                          | double-positive (concordant)  | genus   | G+                                 |
| 142 | P132 | M | 80 | sputum | Unknown | Candida albicans + Lactobacillus fermentum + Viridans Streptococci + Rothia mucilaginosa         | n.a. | Candida albicans + Lactobacillus fermentum + Viridans Streptococci + Rothia mucilaginosa         | Lactobacillus fermentum + Rothia mucilaginosa + Streptococcus sanguinis                           | double-positive (overlapping) | genus   | -                                  |
| 143 | P133 | M | 84 | sputum | LRI     | Klebsiella pneumoniae                                                                            | n.a. | Klebsiella pneumoniae                                                                            | Klebsiella pneumoniae                                                                             | double-positive (concordant)  | species | G-                                 |
| 144 | P134 | M | 51 | sputum | LRI     | Viridans Streptococci + Neisseria                                                                | n.a. | Viridans Streptococci + Neisseria                                                                | Streptococcus sanguinis + Neisseria elongata                                                      | double-positive (concordant)  | genus   | Polymicrobial (multiple bacteria)  |

|     |      |   |    |        |         |                                                                                                                 |      |                                                                                                                 |                                                                                                                            |                               |         |                                   |
|-----|------|---|----|--------|---------|-----------------------------------------------------------------------------------------------------------------|------|-----------------------------------------------------------------------------------------------------------------|----------------------------------------------------------------------------------------------------------------------------|-------------------------------|---------|-----------------------------------|
| 145 | P135 | M | 69 | sputum | LRI     | Acinetobacter baumannii                                                                                         | n.a. | Acinetobacter baumannii                                                                                         | Acinetobacter baumannii                                                                                                    | double-positive (concordant)  | species | G-                                |
| 146 | P136 | F | 71 | sputum | Unknown | Proteus mirabilis                                                                                               | n.a. | Proteus mirabilis                                                                                               | Proteus mirabilis                                                                                                          | double-positive (concordant)  | species | G-                                |
| 147 | P137 | M | 50 | sputum | Unknown | Corynebacterium striatum                                                                                        | n.a. | Corynebacterium striatum                                                                                        | Corynebacterium striatum                                                                                                   | double-positive (concordant)  | species | G+                                |
| 148 | P138 | F | 45 | sputum | LRI     | Stenotrophomonas maltophilia + Staphylococcus aureus + Corynebacterium striatum                                 | n.a. | Stenotrophomonas maltophilia + Staphylococcus aureus + Corynebacterium striatum                                 | Stenotrophomonas maltophilia + Staphylococcus aureus + Corynebacterium striatum                                            | double-positive (concordant)  | species | Polymicrobial (multiple bacteria) |
| 149 | P139 | M | 62 | sputum | LRI     | Pseudomonas aeruginosa + Staphylococcus aureus                                                                  | n.a. | Pseudomonas aeruginosa + Staphylococcus aureus                                                                  | Pseudomonas aeruginosa + Staphylococcus aureus                                                                             | double-positive (concordant)  | species | Polymicrobial (multiple bacteria) |
| 150 | P140 | M | 56 | sputum | Unknown | Klebsiella pneumoniae + Acinetobacter baumannii + Corynebacterium striatum                                      | n.a. | Klebsiella pneumoniae + Acinetobacter baumannii + Corynebacterium striatum                                      | Corynebacterium striatum + Acinetobacter baumannii                                                                         | double-positive (overlapping) | species | -                                 |
| 151 | P141 | M | 65 | sputum | LRI     | Viridans Streptococci + Neisseria + Staphylococcus epidermidis + Staphylococcus aureus + Pseudomonas aeruginosa | n.a. | Viridans Streptococci + Neisseria + Staphylococcus epidermidis + Staphylococcus aureus + Pseudomonas aeruginosa | Staphylococcus epidermidis + Staphylococcus aureus + Streptococcus anginosus + Neisseria subflava + Pseudomonas aeruginosa | double-positive (concordant)  | genus   | Polymicrobial (multiple bacteria) |
| 152 | P94  | M | 61 | sputum | LRI     | Pseudomonas aeruginosa                                                                                          | n.a. | Pseudomonas aeruginosa                                                                                          | Pseudomonas aeruginosa                                                                                                     | double-positive (concordant)  | species | G-                                |
| 153 | P142 | M | 53 | sputum | Unknown | Viridans Streptococci                                                                                           | n.a. | Viridans Streptococci                                                                                           | Streptococcus sanguinis                                                                                                    | double-positive (concordant)  | genus   | G+                                |
| 154 | P143 | F | 81 | sputum | Unknown | Viridans Streptococci                                                                                           | n.a. | Viridans Streptococci                                                                                           | Streptococcus anginosus                                                                                                    | double-positive (concordant)  | species | G+                                |
| 155 | P144 | M | 44 | sputum | LRI     | Acinetobacter baumannii + Staphylococcus aureus                                                                 | n.a. | Acinetobacter baumannii + Staphylococcus aureus                                                                 | Acinetobacter baumannii + Staphylococcus aureus                                                                            | double-positive (concordant)  | species | Polymicrobial (multiple bacteria) |
| 156 | P145 | M | 53 | sputum | Unknown | Streptococcus dysgalactiae                                                                                      | n.a. | Streptococcus dysgalactiae                                                                                      | Streptococcus dysgalactiae                                                                                                 | double-positive (concordant)  | species | G+                                |
| 157 | P146 | M | 49 | sputum | LRI     | Aspergillus fumigatus                                                                                           | n.a. | Aspergillus fumigatus                                                                                           | Aspergillus fumigatus                                                                                                      | double-positive (concordant)  | species | Fungi                             |
| 158 | P147 | F | 58 | sputum | LRI     | Serratia marcescens                                                                                             | n.a. | Serratia marcescens                                                                                             | Serratia marcescens                                                                                                        | double-positive (concordant)  | species | G-                                |

|     |      |   |    |        |         |                                                                                                                    |                           |                                                                                                                    |                                                                                                            |                               |         |                                   |
|-----|------|---|----|--------|---------|--------------------------------------------------------------------------------------------------------------------|---------------------------|--------------------------------------------------------------------------------------------------------------------|------------------------------------------------------------------------------------------------------------|-------------------------------|---------|-----------------------------------|
| 159 | P148 | M | 45 | sputum | Unknown | Viridans Streptococci                                                                                              | n.a.                      | Viridans Streptococci                                                                                              | Streptococcus oralis                                                                                       | double-positive (concordant)  | species | G+                                |
| 160 | P149 | M | 92 | sputum | Unknown | Viridans Streptococci                                                                                              | n.a.                      | Viridans Streptococci                                                                                              | Streptococcus pseudopneumoniae                                                                             | double-positive (concordant)  | species | G+                                |
| 161 | P150 | M | 70 | sputum | Unknown | Viridans Streptococci + Neisseria + Rothia mucilaginosa + Streptococcus parasanguinis + Haemophilus parainfluenzae | n.a.                      | Viridans Streptococci + Neisseria + Rothia mucilaginosa + Streptococcus parasanguinis + Haemophilus parainfluenzae | Streptococcus parasanguinis + Neisseria subflava + Rothia mucilaginosa + Haemophilus parainfluenzae        | double-positive (concordant)  | genus   | Polymicrobial (multiple bacteria) |
| 162 | P151 | M | 79 | sputum | LRI     | Acinetobacter baumannii + Pseudomonas aeruginosa + Corynebacterium striatum + Stenotrophomonas maltophilia         | n.a.                      | Acinetobacter baumannii + Pseudomonas aeruginosa + Corynebacterium striatum + Stenotrophomonas maltophilia         | Acinetobacter baumannii + Pseudomonas aeruginosa + Corynebacterium striatum + Stenotrophomonas maltophilia | double-positive (concordant)  | species | Polymicrobial (multiple bacteria) |
| 163 | P152 | M | 17 | sputum | Unknown | negative                                                                                                           | Klebsiella pneumoniae (+) | Klebsiella pneumoniae                                                                                              | Corynebacterium resistens + Corynebacterium striatum + Klebsiella pneumoniae                               | double-positive (overlapping) | species | -                                 |
| 164 | P14  | M | 29 | sputum | LRI     | Mycobacterium                                                                                                      | n.a.                      | Mycobacterium                                                                                                      | Mycobacterium tuberculosis                                                                                 | double-positive (concordant)  | genus   | MTB                               |
| 165 | P62  | M | 19 | sputum | Unknown | Haemophilus + Neisseria                                                                                            | n.a.                      | Haemophilus + Neisseria                                                                                            | Neisseria elongata                                                                                         | double-positive (overlapping) | genus   | -                                 |
| 166 | P153 | M | 30 | sputum | Unknown | Mycobacterium                                                                                                      | n.a.                      | Mycobacterium                                                                                                      | Mycobacterium tuberculosis                                                                                 | double-positive (concordant)  | genus   | MTB                               |
| 167 | P154 | F | 28 | sputum | LRI     | Acinetobacter baumannii                                                                                            | n.a.                      | Acinetobacter baumannii                                                                                            | Acinetobacter baumannii                                                                                    | double-positive (concordant)  | species | G-                                |
| 168 | P155 | F | 34 | sputum | LRI     | Mycobacterium                                                                                                      | n.a.                      | Mycobacterium                                                                                                      | Mycobacterium tuberculosis                                                                                 | double-positive (concordant)  | genus   | MTB                               |
| 169 | P156 | M | 72 | sputum | LRI     | Mycobacterium                                                                                                      | n.a.                      | Mycobacterium                                                                                                      | Mycobacterium tuberculosis                                                                                 | double-positive (concordant)  | genus   | MTB                               |
| 170 | P157 | M | 64 | sputum | LRI     | Escherichia coli                                                                                                   | n.a.                      | Escherichia coli                                                                                                   | Escherichia coli                                                                                           | double-positive (concordant)  | species | G-                                |
| 171 | P158 | M | 32 | sputum | Unknown | Viridans Streptococci                                                                                              | n.a.                      | Viridans Streptococci                                                                                              | Streptococcus oralis                                                                                       | double-positive (concordant)  | species | G+                                |
| 172 | P159 | M | 78 | sputum | LRI     | Mycobacterium                                                                                                      | n.a.                      | Mycobacterium                                                                                                      | Mycobacterium tuberculosis                                                                                 | double-positive (concordant)  | genus   | MTB                               |
| 173 | P160 | F | 16 | sputum | LRI     | Mycobacterium                                                                                                      | n.a.                      | Mycobacterium                                                                                                      | Mycobacterium tuberculosis                                                                                 | double-positive (concordant)  | genus   | MTB                               |

|     |      |   |    |        |         |                                          |                            |                                          |                                                                                                  |                               |         |                                    |
|-----|------|---|----|--------|---------|------------------------------------------|----------------------------|------------------------------------------|--------------------------------------------------------------------------------------------------|-------------------------------|---------|------------------------------------|
| 174 | P161 | M | 53 | sputum | LRI     | Mycobacterium                            | n.a.                       | Mycobacterium                            | Mycobacterium tuberculosis                                                                       | double-positive (concordant)  | genus   | MTB                                |
| 175 | P162 | F | 29 | sputum | LRI     | Mycobacterium                            | n.a.                       | Mycobacterium                            | Mycobacterium tuberculosis                                                                       | double-positive (concordant)  | genus   | MTB                                |
| 176 | P163 | M | 59 | sputum | Unknown | Rothia mucilaginosa                      | n.a.                       | Rothia mucilaginosa                      | Legionella pneumophila + Rothia mucilaginosa                                                     | double-positive (overlapping) | species | -                                  |
| 177 | P164 | M | 58 | sputum | LRI     | Neisseria + Mycobacterium                | n.a.                       | Neisseria + Mycobacterium                | Neisseria subflava + Mycobacterium tuberculosis                                                  | double-positive (concordant)  | genus   | Polymicrobial (multiple bacteria)  |
| 178 | P165 | F | 65 | sputum | LRI     | Klebsiella pneumoniae + Candida albicans | n.a.                       | Klebsiella pneumoniae + Candida albicans | Klebsiella pneumoniae + Candida albicans                                                         | double-positive (concordant)  | species | Polymicrobial (bacteria and fungi) |
| 179 | P166 | M | 70 | sputum | LRI     | Viridans Streptococci                    | n.a.                       | Viridans Streptococci                    | Epstein-Barr virus                                                                               | double-positive (discordant)  | -       | -                                  |
| 180 | P167 | M | 63 | BALF   | LRI     | Mycobacterium                            | n.a.                       | Mycobacterium                            | Mycobacterium tuberculosis + Pseudomonas aeruginosa                                              | double-positive (overlapping) | genus   | -                                  |
| 181 | P168 | F | 34 | BALF   | LRI     | Viridans Streptococci                    | n.a.                       | Viridans Streptococci                    | Pneumocystis jirovecii                                                                           | double-positive (discordant)  | -       | -                                  |
| 182 | P169 | M | 31 | BALF   | Unknown | negative                                 | Pneumocystis jirovecii (-) | negative                                 | Pneumocystis jirovecii                                                                           | mNGS-positive                 | -       | -                                  |
| 183 | P170 | M | 56 | BALF   | Unknown | negative                                 | Epstein-Barr virus (+)     | Epstein-Barr virus                       | Klebsiella aerogenes + Epstein-Barr virus                                                        | double-positive (overlapping) | species | -                                  |
| 184 | P171 | M | 66 | BALF   | Unknown | negative                                 | n.a.                       | negative                                 | Haemophilus parainfluenzae                                                                       | mNGS-positive                 | -       | -                                  |
| 185 | P172 | M | 26 | BALF   | Unknown | negative                                 | n.a.                       | negative                                 | Pseudomonas putida                                                                               | mNGS-positive                 | -       | -                                  |
| 186 | P173 | F | 17 | BALF   | LRI     | Klebsiella pneumoniae                    | n.a.                       | Klebsiella pneumoniae                    | Pneumocystis jirovecii + Klebsiella pneumoniae                                                   | double-positive (overlapping) | species | -                                  |
| 187 | P174 | M | 71 | BALF   | Unknown | Neisseria                                | n.a.                       | Neisseria                                | Elizabethkingia meningoseptica + Pseudomonas aeruginosa                                          | double-positive (discordant)  | -       | -                                  |
| 188 | P175 | M | 38 | BALF   | Unknown | Viridans Streptococci                    | n.a.                       | Viridans Streptococci                    | Human betaherpesvirus 5 + Proteus mirabilis + Chryseobacterium indologenes + Streptococcus mitis | double-positive (overlapping) | species | -                                  |
| 189 | P176 | M | 49 | BALF   | Unknown | Viridans Streptococci                    | n.a.                       | Viridans Streptococci                    | Enterococcus faecium + Candida glabrata                                                          | double-positive (discordant)  | -       | -                                  |
| 190 | P177 | F | 43 | BALF   | LRI     | Mycobacterium                            | n.a.                       | Mycobacterium                            | Mycobacterium tuberculosis + Epstein-Barr virus                                                  | double-positive (overlapping) | genus   | -                                  |
| 191 | P178 | M | 14 | BALF   | Unknown | negative                                 | n.a.                       | negative                                 | negative                                                                                         | double-negative               | -       | -                                  |
| 192 | P179 | F | 58 | BALF   | LRI     | Klebsiella pneumoniae                    | n.a.                       | Klebsiella pneumoniae                    | Klebsiella pneumoniae                                                                            | double-positive (concordant)  | species | G-                                 |
| 193 | P180 | M | 13 | BALF   | Unknown | Viridans Streptococci                    | n.a.                       | Viridans Streptococci                    | Streptococcus sanguinis                                                                          | double-positive (concordant)  | genus   | G+                                 |

|     |      |   |    |      |         |                              |      |                              |                                                                                    |                                  |         |         |
|-----|------|---|----|------|---------|------------------------------|------|------------------------------|------------------------------------------------------------------------------------|----------------------------------|---------|---------|
| 194 | P181 | F | 22 | BALF | Unknown | negative                     | n.a. | negative                     | <i>Stenotrophomonas maltophilia</i>                                                | mNGS-positive                    | -       | -       |
| 195 | P182 | F | 54 | BALF | Unknown | Neisseria                    | n.a. | Neisseria                    | Pneumocystis jirovecii +<br>Human betaherpesvirus 5 +<br><i>Neisseria subflava</i> | double-positive<br>(overlapping) | genus   | -       |
| 196 | P183 | F | 42 | BALF | Unknown | Human betaherpesvirus<br>5   | n.a. | Human<br>betaherpesvirus 5   | Human betaherpesvirus 5                                                            | double-positive<br>(concordant)  | species | Viruses |
| 197 | P184 | M | 26 | BALF | Unknown | Viridans Streptococci        | n.a. | Viridans<br>Streptococci     | negative                                                                           | CT-positive                      | -       | -       |
| 198 | P185 | F | 43 | BALF | Unknown | negative                     | n.a. | negative                     | <i>Chryseobacterium indologenes</i>                                                | mNGS-positive                    | -       | -       |
| 199 | P186 | M | 69 | BALF | Unknown | <i>Klebsiella pneumoniae</i> | n.a. | <i>Klebsiella pneumoniae</i> | Human betaherpesvirus 5                                                            | double-positive<br>(discordant)  | -       | -       |
| 200 | P187 | M | 59 | BALF | Unknown | negative                     | n.a. | negative                     | negative                                                                           | double-negative                  | -       | -       |
| 201 | P188 | M | 70 | BALF | Unknown | <i>Mycobacterium</i>         | n.a. | <i>Mycobacterium</i>         | <i>Mycobacterium tuberculosis</i>                                                  | double-positive<br>(concordant)  | genus   | MTB     |

Abbreviations: SID, sample ID; PID, patient ID; F, female; M, male; BALF, bronchoalveolar lavage fluid; LRI, lower respiratory infection; BSI, bloodstream infection; CNS, central nervous system infection; CMT, clinical microbiological testing; CT, convention test; mNGS, metagenomic next-generation sequencing; n.a., not available; MTB, *Mycobacterium tuberculosis*.

**Table S2.** The medical information of 24 cases whose mNGS results assisted treatment modification.

| PID  | SID | CT                                                                                                                   | mNGS                                                                                                                     | mNGS/CT comparison | Treatment                                                                                 | Outcome           |
|------|-----|----------------------------------------------------------------------------------------------------------------------|--------------------------------------------------------------------------------------------------------------------------|--------------------|-------------------------------------------------------------------------------------------|-------------------|
| P1   | 1   | Negative                                                                                                             | <i>Pneumocystis jirovecii</i> + <i>Human betaherpesvirus 5</i>                                                           | mNGS+              | Ganciclovir, Tigecycline, Meropenem and Caspofungin combined with Sulfamethoxazole Tablet | Improve           |
| P7   | 8   | Negative                                                                                                             | <i>Staphylococcus haemolyticus</i> + <i>Enterococcus faecium</i> + <i>Mycobacterium tuberculosis Complex</i>             | mNGS+              | Piperacillin tazobactam combined with teicoplanin                                         | Improve           |
| P19  | 21  | Negative                                                                                                             | <i>Legionella pneumophila</i>                                                                                            | mNGS+              | Moxifloxacin Hydrochloride                                                                | Improve           |
| P24  | 26  | Negative                                                                                                             | <i>Mycoplasma hominis</i>                                                                                                | mNGS+              | Moxifloxacin                                                                              | Improve           |
| P29  | 31  | Negative                                                                                                             | <i>Escherichia coli</i>                                                                                                  | mNGS+              | Levofloxacin                                                                              | Improve           |
| P38  | 42  | Negative                                                                                                             | <i>Cryptococcus neoformans</i> + <i>Enterococcus faecalis</i>                                                            | mNGS+              | Levofloxacin combined with Voriconazole                                                   | Improve           |
| P41  | 45  | Negative                                                                                                             | <i>Human herpesvirus 1</i> + <i>Acinetobacter baumannii</i> + <i>Epstein-Barr virus</i>                                  | mNGS+              | Cefoperazone Sodium and Sulbactam Sodium                                                  | Lost to follow up |
| P42  | 47  | Negative                                                                                                             | <i>Pneumocystis jirovecii</i> + <i>Human herpesvirus 1</i>                                                               | mNGS+              | sulfamethoxazole combined with oseltamivir                                                | Death             |
| P50  | 55  | Negative                                                                                                             | <i>Acinetobacter baumannii</i>                                                                                           | mNGS+              | Tigecycline                                                                               | Lost to follow up |
| P86  | 91  | Negative                                                                                                             | <i>Klebsiella pneumoniae</i> + <i>Pseudomonas aeruginosa</i>                                                             | mNGS+              | Levofloxacin combined with Ceftizoxime Sodium                                             | Improve           |
| P12  | 14  | <i>Viridans Streptococci</i>                                                                                         | <i>Streptococcus agalactiae</i> + <i>Human betaherpesvirus 7</i>                                                         | overlapping        | Cefoperazone Sodium and Sulbactam Sodium                                                  | Improve           |
| P27  | 29  | <i>Proteus mirabilis</i>                                                                                             | <i>Pseudomonas aeruginosa</i> + <i>Klebsiella pneumoniae</i> + <i>Acinetobacter baumannii</i> + <i>Proteus mirabilis</i> | overlapping        | Cefoperazone Sodium and Sulbactam Sodium                                                  | Lost to follow up |
| P73  | 77  | <i>Staphylococcus aureus</i> + <i>Enterobacter cloacae</i>                                                           | <i>Staphylococcus aureus</i>                                                                                             | overlapping        | Cefoperazone Sodium and Sulbactam Sodium                                                  | Lost to follow up |
| P82  | 87  | <i>Candida glabrata</i> + <i>Candida albicans</i>                                                                    | <i>Candida glabrata</i>                                                                                                  | overlapping        | Caspofungin                                                                               | Improve           |
| P107 | 113 | <i>Viridans Streptococci</i> + <i>Neisseria</i>                                                                      | <i>Neisseria elongata</i>                                                                                                | overlapping        | Moxifloxacin                                                                              | Improve           |
| P132 | 142 | <i>Candida albicans</i> + <i>Lactobacillus fermentum</i> + <i>Viridans Streptococci</i> + <i>Rothia mucilaginosa</i> | <i>Lactobacillus fermentum</i> + <i>Rothia mucilaginosa</i> + <i>Streptococcus sanguinis</i>                             | overlapping        | Cefodizime Sodium                                                                         | Improve           |
| P170 | 183 | <i>Epstein-Barr virus</i>                                                                                            | <i>Klebsiella aerogenes</i> + <i>Epstein-Barr virus</i>                                                                  | overlapping        | Cefoperazone Sodium and Sulbactam Sodium combined with Ganciclovir                        | Improve           |
| P54  | 59  | <i>Viridans Streptococci</i>                                                                                         | <i>Stenotrophomonas maltophilia</i> + <i>Candida glabrata</i>                                                            | discordant         | SMZ combined with Voriconazole                                                            | Improve           |
| P55  | 60  | <i>Viridans Streptococci</i>                                                                                         | <i>Stenotrophomonas maltophilia</i> + <i>Haemophilus parainfluenzae</i>                                                  | discordant         | Moxifloxacin Hydrochloride                                                                | Improve           |
| P67  | 72  | <i>Viridans Streptococci</i>                                                                                         | <i>Staphylococcus haemolyticus</i> + <i>Gordonia bronchialis</i>                                                         | discordant         | Daptomycin                                                                                | Improve           |
| P74  | 79  | <i>Candida albicans</i>                                                                                              | <i>Klebsiella pneumoniae</i>                                                                                             | discordant         | Tigecycline                                                                               | Improve           |
| P96  | 101 | <i>Candida albicans</i>                                                                                              | <i>Streptococcus salivarius</i>                                                                                          | discordant         | Piperacillin                                                                              | Improve           |
| P166 | 179 | <i>Viridans Streptococci</i>                                                                                         | <i>Epstein-Barr virus</i>                                                                                                | discordant         | Ganciclovir                                                                               | Lost to follow up |
| P186 | 199 | <i>Klebsiella pneumoniae</i>                                                                                         | <i>Human betaherpesvirus 5</i>                                                                                           | discordant         | DAA                                                                                       | Lost to follow up |
